# Supplementary material
Source: Springer Nature journal article supplement (https://www.springermedizin.de/resource/supplementary/12889_2010_2674_MOESM1_ESM.pdf/9487010)
Supplement: MOESM1 [file 9487010]

Twins participating in SALT, age 40-65 years

N=32,453

Participants that answered work/absenteeism question

Study sample n=31,122 (52% women)

LTSA in SALT (self-reported)  
n=1027 (681 women)

LTSA also in  
MiDAS registry  
n=904  
(590 women)

LTSA in SALT, not in  
MiDAS at same time  
as interview  
n=123 (91 women)

Not LTSA in SALT or MiDAS registry  
n=28,985 (14,947 women)

LTSA in MiDAS at time of interview,  
but no self-report of LTSA in SALT  
n=1110 (724 women)

DP in SALT (self-reported)  
n=2769 (1690 women)

DP also in  
MiDAS  
n= 2443  
(1502 women)

DP in SALT, not  
in MiDAS  
registry  
n=326  
(188 women)

Not DP in SALT or MiDAS  
registry  
n=27,306 (13,973 women)

DP in MiDAS at time of interview,  
but no self-report of DP in SALT  
n=1047 (689 women)
